# Supplementary material for: Ab initio study of the topological itinerant transport properties observed between excited edge states in a 2D compound with the Mn15B16Ni composition
Source: Royal Society of Chemistry journal article supplement (doi:10.1039/d3cp03837h), 2023-01-01
Supplement: d3cp03837h1.zip [file d3cp03837h1.zip]

# Datablock: VESTA\_phase\_1

|                    |                    |            |                    |
|--------------------|--------------------|------------|--------------------|
| Bond precision:    |                    | = 0.0000 Å | Wavelength=0.71073 |
| Cell:              | a=11.18878         | b=11.18878 | c=29.48594         |
|                    | alpha=90           | beta=90    | gamma=90           |
| Temperature        | 5 K                |            |                    |
| :                  |                    |            |                    |
|                    | Calculated         | Reported   |                    |
| Volume             | 3691.310           | 3691       |                    |
| Space group        | P 1                | P 1        |                    |
| Hall group         | P 1                | P 1        |                    |
| Moiety formula     | B16 Mn15 Ni        | ?          |                    |
| Sum formula        | B16 Mn15 Ni        | Mn15B16Ni  |                    |
| Mr                 | 1055.75            | 1055.70    |                    |
| Dx,g cm-3          | 0.475              | 0.000      |                    |
| Z                  | 1                  | 1          |                    |
| Mu (mm-1)          | 1.354              | 0.000      |                    |
| F000               | 483.0              | 0.0        |                    |
| F000'              | 488.41             |            |                    |
| h,k,lmax           |                    |            |                    |
| Nref               |                    |            |                    |
| Tmin,Tmax          |                    |            |                    |
| Tmin'              |                    |            |                    |
| Correction method= | Not given          |            |                    |
| Data completeness= | Theta (max)=       |            |                    |
| R(reflections)=    | wR2 (reflections)= |            |                    |
| S =                | Npar=              |            |                    |

The following ALERTS were generated. Each ALERT has the format  
**test-name\_ALERT\_alert-type\_alert-level.**  
Click on the hyperlinks for more details of the test.

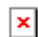

## Alert level A

[PLAT602\\_ALERT\\_2\\_A](#) Solvent Accessible VOID(S) in Structure ..... ! Check

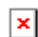

## Alert level B

[SYMMS02\\_ALERT\\_1\\_B](#) The unit-cell lengths a and c should be equal for a cubic cell

|        |         |         |         |
|--------|---------|---------|---------|
| Cell   | 11.1888 | 11.1888 | 29.4859 |
| Angles | 90.0000 | 90.0000 | 90.0000 |

[PLAT049\\_ALERT\\_1\\_B](#) Calculated Density Less Than 1.0 gcm-3 ..... 0.4749 Check

[PLAT111\\_ALERT\\_2\\_B](#) ADDSYM Detects New (Pseudo) Centre of Symmetry . 100 %Fit

[PLAT112\\_ALERT\\_2\\_B](#) ADDSYM Detects New (Pseudo) Symm. Elem 4 100 %Fit

### And 4 other PLAT112 Alerts

[PLAT112\\_ALERT\\_2\\_B](#) ADDSYM Detects New (Pseudo) Symm. Elem m 100 %Fit

[PLAT112\\_ALERT\\_2\\_B](#) ADDSYM Detects New (Pseudo) Symm. Elem m 100 %Fit

[PLAT112\\_ALERT\\_2\\_B](#) ADDSYM Detects New (Pseudo) Symm. Elem m 100 %Fit

[PLAT112\\_ALERT\\_2\\_B](#) ADDSYM Detects New (Pseudo) Symm. Elem m 100 %Fit

[PLAT113\\_ALERT\\_2\\_B](#) ADDSYM Suggests Possible Pseudo/New Space Group P4/mmm Check  
Check Model Parameter Symmetry for Reflection Data Support

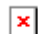

## Alert level C

[CELLK01\\_ALERT\\_1\\_C](#) Check that the cell measurement temperature is in Kelvin.  
Value of measurement temperature given = 5.000

[PLAT029\\_ALERT\\_3\\_C](#) \_diffn\_measured\_fraction\_theta\_full value Low . 0.970 Why?

[PLAT034\\_ALERT\\_1\\_C](#) No Flack Parameter Given. Z > Si, NonCentro .... Please Do !

[PLAT041\\_ALERT\\_1\\_C](#) Calc. and Reported SumFormula Strings Differ Please Check

|                                   |                                                  |               |
|-----------------------------------|--------------------------------------------------|---------------|
| <a href="#">PLAT141_ALERT_4_C</a> | s.u. on a - Axis Small or Missing .....          | 0.00000 Ang.  |
| <a href="#">PLAT142_ALERT_4_C</a> | s.u. on b - Axis Small or Missing .....          | 0.00000 Ang.  |
| <a href="#">PLAT143_ALERT_4_C</a> | s.u. on c - Axis Small or Missing .....          | 0.00000 Ang.  |
| <a href="#">PLAT144_ALERT_4_C</a> | s.u. on alpha Small or Missing .....             | 0.0000 Degree |
| <a href="#">PLAT145_ALERT_4_C</a> | s.u. on beta Small or Missing .....              | 0.0000 Degree |
| <a href="#">PLAT146_ALERT_4_C</a> | s.u. on gamma Small or Missing .....             | 0.0000 Degree |
| <a href="#">PLAT151_ALERT_1_C</a> | No s.u. (esd) Given on Volume .....              | Please Do !   |
| <a href="#">PLAT250_ALERT_2_C</a> | Large U3/U1 Ratio for Average U(i,j) Tensor .... | 4.0 Note      |

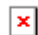

## Alert level G

|                                   |                                                  |             |
|-----------------------------------|--------------------------------------------------|-------------|
| <a href="#">PLAT004_ALERT_5_G</a> | Polymeric Structure Found with Maximum Dimension | 2 Info      |
| <a href="#">PLAT005_ALERT_5_G</a> | No Embedded Refinement Details Found in the CIF  | Please Do ! |
| <a href="#">PLAT104_ALERT_1_G</a> | The Reported Crystal System is Inconsistent with | P1 Check    |
| <a href="#">PLAT110_ALERT_2_G</a> | ADDSYM Detects Potential Lattice Translation ... | ? Check     |
| <a href="#">PLAT112_ALERT_2_G</a> | ADDSYM Detects New (Pseudo) Symm. Elem C         | 100 %Fit    |

## And 14 other PLAT112 Alerts

|                                   |                                        |     |          |
|-----------------------------------|----------------------------------------|-----|----------|
| <a href="#">PLAT112_ALERT_2_G</a> | ADDSYM Detects New (Pseudo) Symm. Elem | sub | 100 %Fit |
| <a href="#">PLAT112_ALERT_2_G</a> | ADDSYM Detects New (Pseudo) Symm. Elem | b/2 | 100 %Fit |
| <a href="#">PLAT112_ALERT_2_G</a> | ADDSYM Detects New (Pseudo) Symm. Elem | 361 | 100 %Fit |
| <a href="#">PLAT112_ALERT_2_G</a> | ADDSYM Detects New (Pseudo) Symm. Elem | a/2 | 100 %Fit |
| <a href="#">PLAT112_ALERT_2_G</a> | ADDSYM Detects New (Pseudo) Symm. Elem | 311 | 100 %Fit |
| <a href="#">PLAT112_ALERT_2_G</a> | ADDSYM Detects New (Pseudo) Symm. Elem | 631 | 100 %Fit |
| <a href="#">PLAT112_ALERT_2_G</a> | ADDSYM Detects New (Pseudo) Symm. Elem | 131 | 100 %Fit |
| <a href="#">PLAT112_ALERT_2_G</a> | ADDSYM Detects New (Pseudo) Symm. Elem | 331 | 100 %Fit |
| <a href="#">PLAT112_ALERT_2_G</a> | ADDSYM Detects New (Pseudo) Symm. Elem | 121 | 100 %Fit |
| <a href="#">PLAT112_ALERT_2_G</a> | ADDSYM Detects New (Pseudo) Symm. Elem | 221 | 100 %Fit |
| <a href="#">PLAT112_ALERT_2_G</a> | ADDSYM Detects New (Pseudo) Symm. Elem | 521 | 100 %Fit |
| <a href="#">PLAT112_ALERT_2_G</a> | ADDSYM Detects New (Pseudo) Symm. Elem | 151 | 100 %Fit |
| <a href="#">PLAT112_ALERT_2_G</a> | ADDSYM Detects New (Pseudo) Symm. Elem | 251 | 100 %Fit |
| <a href="#">PLAT112_ALERT_2_G</a> | ADDSYM Detects New (Pseudo) Symm. Elem | 551 | 100 %Fit |

|                                   |           |                   |                |           |
|-----------------------------------|-----------|-------------------|----------------|-----------|
| <a href="#">PLAT721_ALERT_1_G</a> | Bond Calc | 9.88409, Rep      | 2.00000 Dev... | 7.88 Ang. |
|                                   | MN1 -B1   | 1_555 1_555 ..... | #              | 2 Check   |

## And 3 other PLAT721 Alerts

|                                   |           |                   |                |           |
|-----------------------------------|-----------|-------------------|----------------|-----------|
| <a href="#">PLAT721_ALERT_1_G</a> | Bond Calc | 10.64960, Rep     | 2.00000 Dev... | 8.65 Ang. |
|                                   | MN1 -B2   | 1_555 1_555 ..... | #              | 3 Check   |
| <a href="#">PLAT721_ALERT_1_G</a> | Bond Calc | 1.96152, Rep      | 2.00000 Dev... | 0.04 Ang. |
|                                   | B6 -NI1   | 1_555 1_555 ..... | #              | 5 Check   |
| <a href="#">PLAT721_ALERT_1_G</a> | Bond Calc | 2.77582, Rep      | 2.80000 Dev... | 0.02 Ang. |
|                                   | MN7 -NI1  | 1_555 1_555 ..... | #              | 6 Check   |

|                                   |                                                  |                   |              |              |
|-----------------------------------|--------------------------------------------------|-------------------|--------------|--------------|
| <a href="#">PLAT722_ALERT_1_G</a> | Angle Calc                                       | 15.07, Rep        | 26.50 Dev... | 11.43 Degree |
|                                   | B1 -MN1 -B2                                      | 1_555 1_555 1_555 | #            | 1 Check      |
| <a href="#">PLAT722_ALERT_1_G</a> | Angle Calc                                       | 16.30, Rep        | 89.80 Dev... | 73.50 Degree |
|                                   | MN1 -B1 -MN2                                     | 1_555 1_555 1_555 | #            | 2 Check      |
| <a href="#">PLAT808_ALERT_5_G</a> | No Parseable SHELXL Style Weighting Scheme Found |                   |              | Please Check |
| <a href="#">PLAT881_ALERT_1_G</a> | No Datum for _diffrn_reflms_av_R_equivalents ... |                   |              | Please Do !  |
| <a href="#">PLAT882_ALERT_1_G</a> | No Datum for _diffrn_reflms_av_unetI/netI .....  |                   |              | Please Do !  |
| <a href="#">PLAT883_ALERT_1_G</a> | No Info/Value for _atom_sites_solution_primary . |                   |              | Please Do !  |
| <a href="#">PLAT980_ALERT_1_G</a> | No Anomalous Scattering Factors Found in CIF ... |                   |              | Please Check |

- 1 **ALERT level A** = Most likely a serious problem - resolve or explain  
9 **ALERT level B** = A potentially serious problem, consider carefully  
12 **ALERT level C** = Check. Ensure it is not caused by an omission or oversight  
30 **ALERT level G** = General information/check it is not something unexpected

- 17 ALERT type 1 CIF construction/syntax error, inconsistent or missing data  
25 ALERT type 2 Indicator that the structure model may be wrong or deficient  
1 ALERT type 3 Indicator that the structure quality may be low  
6 ALERT type 4 Improvement, methodology, query or suggestion  
3 ALERT type 5 Informative message, check

It is advisable to attempt to resolve as many as possible of the alerts in all categories. Often the minor
